# Supplementary material
Source: PubMed Central journal article supplement (PMC3614089)

## Supplemental Figures

### “Systemic isotretinoin therapy normalizes exaggerated TLR-2-mediated innate immune responses in acne patients”

Dispenza et al.

#### **Figure S1: Mean ( $\pm$ SEM) lesion counts of acne patients on isotretinoin therapy:**

Inflammatory and non-inflammatory lesions were counted on the face (excluding the nose) of acne patients prior to ( $n = 25$ ) and during isotretinoin therapy (1 week,  $n = 19$ ; 4 weeks,  $n = 19$ ; 8 weeks,  $n = 17$ ; 20 weeks,  $n = 10$ ) using standard visual counting techniques. The mean ( $\pm$  SEM) number of inflammatory lesions at baseline was  $41 \pm 6.3$ , and the mean ( $\pm$  SEM) number of noninflammatory lesions was  $68 \pm 17$ . \* $P < 0.05$ , \*\* $P < 0.01$ , and \*\*\* $P < 0.001$  compared with patients' baseline counts.

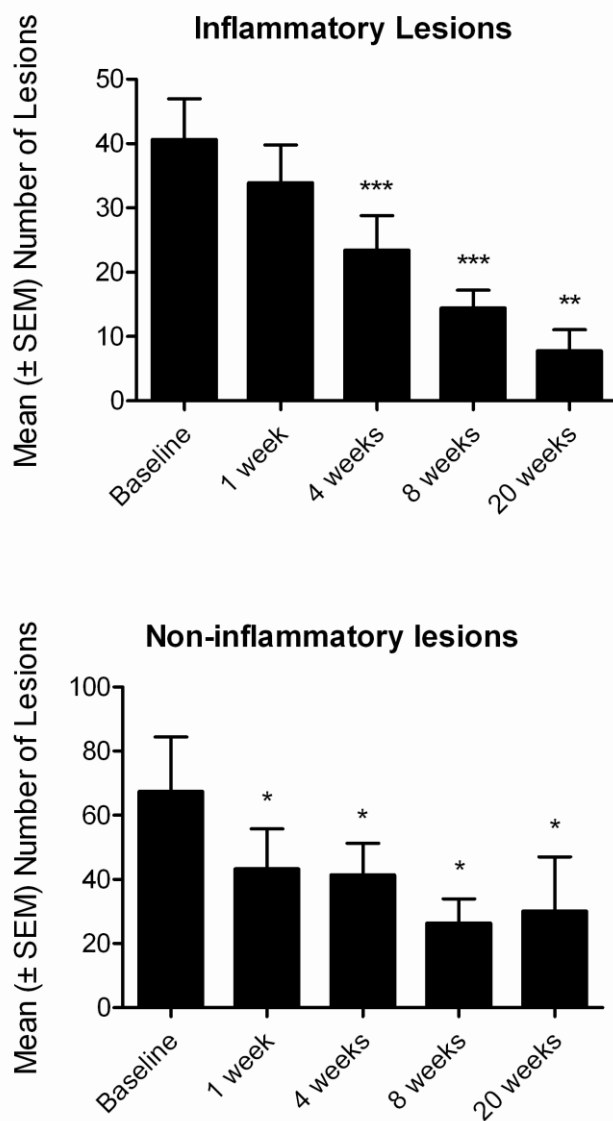

**Figure S2: Serum levels of retinoids in acne patients and normal volunteers:** Levels of the three retinoic acid isomers in the serum of normal volunteers (n = 19) and acne patients at baseline (n = 25), 1 week (n = 19), 4 weeks (n = 19), 8 weeks (n = 17), and 20 weeks (n = 10) of isotretinoin therapy were analyzed by HPLC/ mass spectrometry. Mean concentrations  $\pm$  SEM are displayed. \* $P < 0.05$ , \*\* $P < 0.01$ , and \*\*\* $P < 0.001$  compared with patients' baseline.

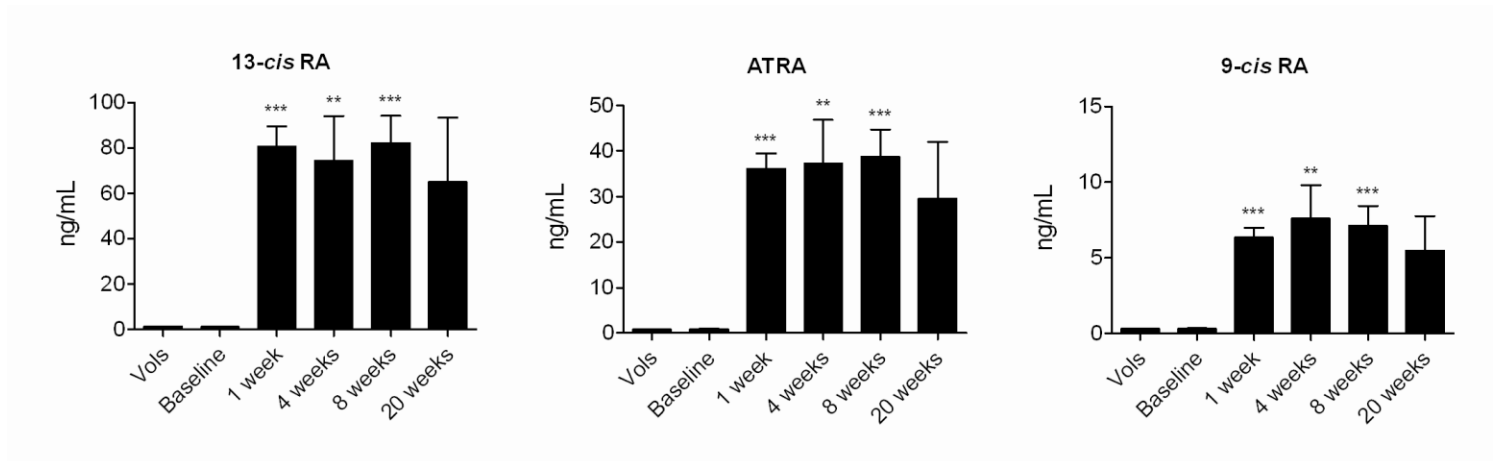

**Figure S3: Isotretinoin does not affect peripheral Treg proportions:** a) Lymphocytes from normal volunteers (Vols) (n = 11) and from patients at baseline (n = 14), 1 week (n = 13), 4 weeks (n = 11), 8 weeks (n = 10), and 20 weeks (n = 5) of isotretinoin therapy were treated for 5 days with *P. acnes* sonicate or anti-CD3/CD28 antibodies as above, whereupon they were stained with fluorescently-conjugated antibodies to T cell subset specific markers. Plots of CD25 versus Foxp3 expression among CD4+ cells are displayed for one representative patient. b) Mean percentages  $\pm$  SEM of CD4+ T cells expressing CD25 and Foxp3 are shown for volunteers and acne patients during isotretinoin therapy.

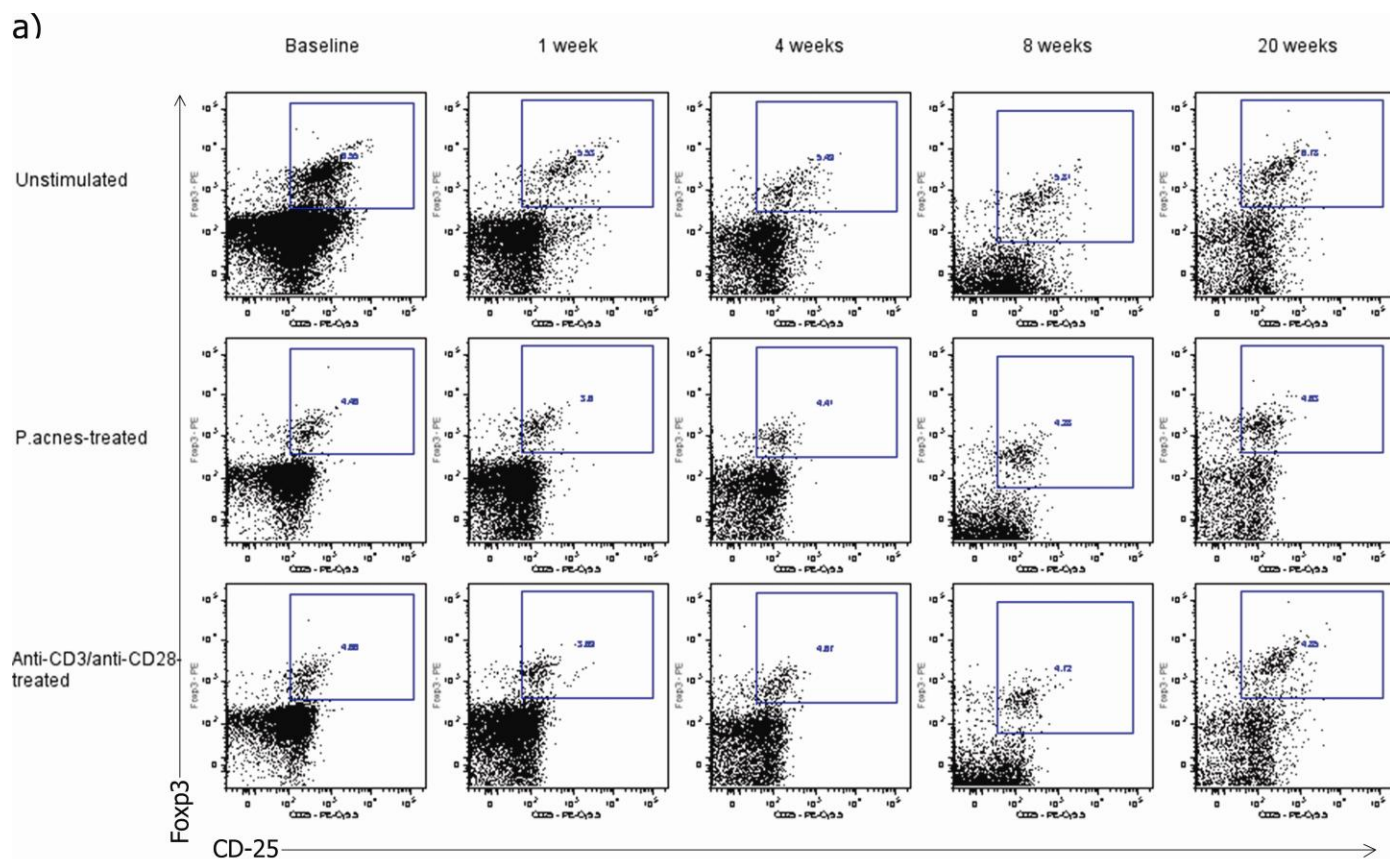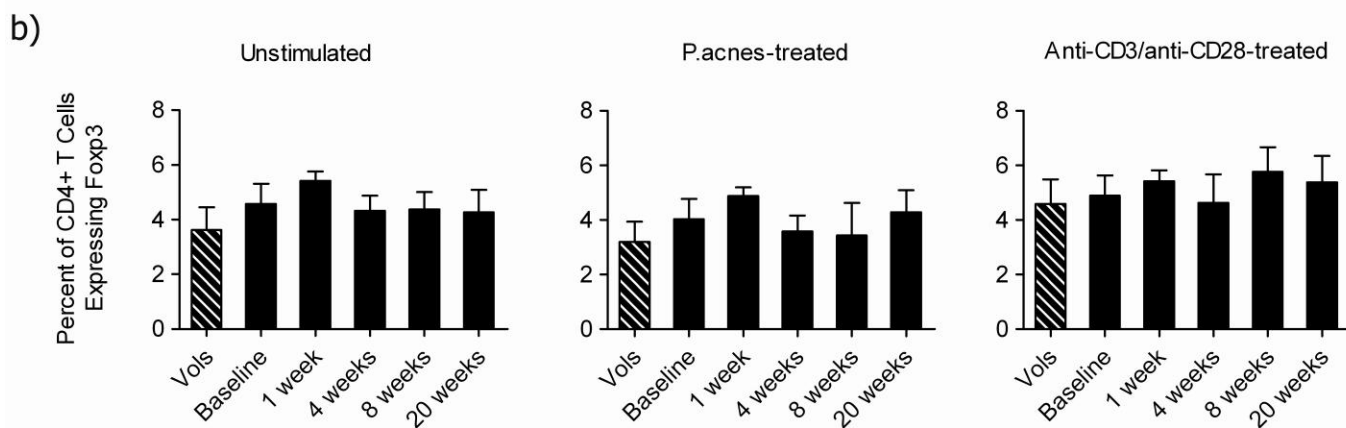

Supplement: NIHMS361654-supplement-supplement_1.pdf [file NIHMS361654-supplement-supplement_1.pdf]
